# Supplementary material for: Determinants of health, health behaviours and demographic profile of patients attending an Australian university student-led osteopathy clinic
Source: PubMed Central journal article supplement (PMC6971880; doi:10.1186/s12998-019-0292-5), 2020-01-21
Supplement: 12998_2019_292_MOESM1_ESM.pdf [file 12998_2019_292_MOESM1_ESM.pdf]

## Health Information Questions

To assist us with providing quality care, monitor treatment outcomes, and improve the service provided at the clinic, we would appreciate you taking the time to answer the following questions. The information that you provide here may also be used for research purposes, and where this occurs no information that could identify you will be used, analysed or published. You may also choose not to have this information made available to researchers in the Victoria University osteopathy course.

**In which country were you born?** \_\_\_\_\_

**Do you speak English at home?**     Yes     No                      **Do you smoke?**     Yes     No

**How often do you have someone help you read hospital materials?**     Always     Most times     Sometimes     Rarely     Never

**How often do you have problems learning about your medical condition because of difficulty understanding written information?**     Always     Most times     Sometimes     Rarely     Never

**Are you confident completing medical forms?**     Not at all confident     A little confident     Somewhat confident     Quite confident     Extremely confident

**How often do you have a problem understanding what is told to you about your medical condition?**     Always     Most times     Sometimes     Rarely     Never

**What is the highest level of education you have completed?**

Primary school or less     Some high school     High school     TAFE or trade qualification     University

**How many hours of sleep do you get each night?**     Less than 6 hours     6-7 hours     7-8 hours     9 or more hours

**How many serves of fruit do you consume each day?** (please circle)    0    1    2    3    4    5    6    7

**How many serves of vegetables do you consume each day?** (please circle)    0    1    2    3    4    5    6    7

**Over the last week, how many days did you exercise for at least 30 minutes per day?**    0    1    2    3    4    5    6    7

**On a usual week day, how much time do you spend sitting:**

**As part of work or volunteer activities?**     0-3 hours     3-6 hours     6-9 hours     9-12 hours     12 hours or more

**In other leisure time?**     0-3 hours     3-6 hours     6-9 hours     9-12 hours     12 hours or more

**Have you had your blood pressure checked by a doctor or health professional in the past 12 months?**     Yes     No

**Do you have or ever suffered from any of the following?** (please tick all that apply)

|                                                   | Currently suffering      | Previously suffered      |
|---------------------------------------------------|--------------------------|--------------------------|
| Arthritis                                         | <input type="checkbox"/> | <input type="checkbox"/> |
| Heart problems                                    | <input type="checkbox"/> | <input type="checkbox"/> |
| High cholesterol                                  | <input type="checkbox"/> | <input type="checkbox"/> |
| High blood pressure                               | <input type="checkbox"/> | <input type="checkbox"/> |
| Asthma                                            | <input type="checkbox"/> | <input type="checkbox"/> |
| Cancer                                            | <input type="checkbox"/> | <input type="checkbox"/> |
| Mental health disorder (i.e. depression, anxiety) | <input type="checkbox"/> | <input type="checkbox"/> |
| Diabetes                                          | <input type="checkbox"/> | <input type="checkbox"/> |
| Kidney disease                                    | <input type="checkbox"/> | <input type="checkbox"/> |

**Please rate your general health:**     Poor     Fair     Good     Very good     Excellent

**Overall, how satisfied are you with your life?** (please circle)    (not at all satisfied)    0    1    2    3    4    5    (extremely satisfied)
