# Supplementary material for: Determinants of health, health behaviours and demographic profile of patients attending an Australian university student-led osteopathy clinic
Source: Chiropr Man Therap. 2020 Jan 21;28:2. doi: 10.1186/s12998-019-0292-5 (PMC6971880; doi:10.1186/s12998-019-0292-5)
Supplement: Supplementary file 2 — Additional file 2. ICD-10 Coding. [file 12998_2019_292_MOESM2_ESM.pdf]

# ICD10

|                                                                                       | Frequency | Percent    | Valid Percent | Cumulative Percent |
|---------------------------------------------------------------------------------------|-----------|------------|---------------|--------------------|
| <b>Valid</b>                                                                          | <b>66</b> | <b>4.1</b> | <b>4.1</b>    | <b>4.1</b>         |
| G43.0 Migraine without aura [common migraine]                                         | 2         | .1         | .1            | 4.2                |
| G43.1 Migraine with aura [classical migraine]                                         | 1         | .1         | .1            | 4.3                |
| G44.2 Tension-type headache                                                           | 8         | .5         | .5            | 4.8                |
| G44.8 Other specified headache syndromes (cervicogenic, refractive error, sinus, TMJ) | 35        | 2.2        | 2.2           | 6.9                |
| G54.0 Thoracic outlet syndrome                                                        | 12        | .7         | .7            | 7.7                |
| G56.0 Carpal tunnel syndrome                                                          | 2         | .1         | .1            | 7.8                |
| G56.1 Other lesions of median nerve                                                   | 1         | .1         | .1            | 7.9                |
| Other mononeuropathy of upper limb                                                    | 1         | .1         | .1            | 7.9                |
| G57.0 Lesion of the sciatic nerve                                                     | 1         | .1         | .1            | 8.0                |
| G57.1 Meralgia paraesthetica                                                          | 1         | .1         | .1            | 8.1                |
| Mortons neuroma                                                                       | 1         | .1         | .1            | 8.1                |
| K07.6 Temporomandibular joint disorders (chronic)                                     | 14        | .9         | .9            | 9.0                |
| M10.0 Gout                                                                            | 1         | .1         | .1            | 9.0                |
| M16.0 Primary coxarthrosis (bilateral hip OA)                                         | 1         | .1         | .1            | 9.1                |
| M16.1 Other primary coxarthrosis (unilateral hip OA)                                  | 3         | .2         | .2            | 9.3                |
| M17.0 Primary gonarthrosis (bilateral knee OA)                                        | 1         | .1         | .1            | 9.4                |
| M17.1 Other primary gonarthrosis (unilateral knee OA)                                 | 1         | .1         | .1            | 9.4                |
| M17.2 Post-traumatic gonarthrosis, bilateral (knee)                                   | 1         | .1         | .1            | 9.5                |
| M17.3 Post-traumatic gonarthrosis                                                     | 1         | .1         | .1            | 9.5                |
| M18.1 Other primary arthrosis of first carpometacarpal joint                          | 1         | .1         | .1            | 9.6                |

# ICD10

|                                                                                  | Frequency | Percent | Valid Percent | Cumulative Percent |
|----------------------------------------------------------------------------------|-----------|---------|---------------|--------------------|
| M19.0 Primary arthrosis of other joints                                          | 1         | .1      | .1            | 9.7                |
| M19.1 Post-traumatic arthrosis of other joints                                   | 1         | .1      | .1            | 9.7                |
| M22.2 Patellofemoral disorders                                                   | 30        | 1.9     | 1.9           | 11.6               |
| M22.4 Chondromalacia patellae                                                    | 3         | .2      | .2            | 11.8               |
| M23.2 Derangement of meniscus due to old tear or injury (Old bucket-handle tear) | 2         | .1      | .1            | 11.9               |
| M23.3 Other meniscus derangements                                                | 7         | .4      | .4            | 12.3               |
| M25.3 Other instability of joint                                                 | 1         | .1      | .1            | 12.4               |
| M25.4 Effusion of joint                                                          | 1         | .1      | .1            | 12.5               |
| M25.8 Other specified joint disorders (FAI, ligamentum teres)                    | 28        | 1.7     | 1.7           | 14.2               |
| M43.1 Spondylolithesis                                                           | 1         | .1      | .1            | 14.3               |
| M45.0 Ankylosing spondylitis                                                     | 1         | .1      | .1            | 14.3               |
| M46.8 Other specified inflammatory spondylopathies                               | 1         | .1      | .1            | 14.4               |
| M47.8 Spondylosis without myelopathy or radiculopathy                            | 19        | 1.2     | 1.2           | 15.6               |
| M50.1 Cervical disc disorder with radiculopathy                                  | 2         | .1      | .1            | 15.7               |
| M50.3 Other cervical disc degeneration                                           | 1         | .1      | .1            | 15.7               |
| M50.9 Cervical disc disorder, unspecified                                        | 5         | .3      | .3            | 16.0               |
| M51.1 Lumbar and other intervertebral disc disorders with radiculopathy          | 11        | .7      | .7            | 16.7               |
| M51.9 Intervertebral disc disorder, unspecified                                  | 64        | 4.0     | 4.0           | 20.7               |
| M53.3 Sacrococcygeal disorders (coccygodynia)                                    | 5         | .3      | .3            | 21.0               |
| M54.2 Cervicalgia                                                                | 148       | 9.2     | 9.2           | 30.2               |
| M54.3 Sciatica                                                                   | 1         | .1      | .1            | 30.2               |

# ICD10

|                                                                                                  | Frequency | Percent | Valid Percent | Cumulative Percent |
|--------------------------------------------------------------------------------------------------|-----------|---------|---------------|--------------------|
| M54.4 Lumbago with sciatica                                                                      | 1         | .1      | .1            | 30.3               |
| M54.5 Low back pain                                                                              | 95        | 5.9     | 5.9           | 36.2               |
| M54.6 Pain in thoracic spine                                                                     | 97        | 6.0     | 6.0           | 42.2               |
| M65.3 Trigger finger                                                                             | 1         | .1      | .1            | 42.3               |
| M65.4 Radial styloid tenosynovitis [de Quervain]                                                 | 2         | .1      | .1            | 42.4               |
| M70.2 Olecranon bursitis                                                                         | 2         | .1      | .1            | 42.5               |
| M70.4 Prepatella bursitis                                                                        | 1         | .1      | .1            | 42.6               |
| M70.5 Other bursitis of the knee                                                                 | 3         | .2      | .2            | 42.8               |
| M70.6 Trochanteric bursitis                                                                      | 6         | .4      | .4            | 43.1               |
| M72.2 Plantar fasciopathy                                                                        | 11        | .7      | .7            | 43.8               |
| M72.8 Traumatic plantar fasciopathy                                                              | 1         | .1      | .1            | 43.9               |
| M75.0 Adhesive capsulitis of shoulder                                                            | 2         | .1      | .1            | 44.0               |
| M75.1 Rotator cuff syndrome                                                                      | 20        | 1.2     | 1.2           | 45.2               |
| M75.2 Bicipital tendinitis                                                                       | 24        | 1.5     | 1.5           | 46.7               |
| M75.4 Impingement syndrome of shoulder                                                           | 25        | 1.5     | 1.5           | 48.3               |
| M75.5 Bursitis of shoulder                                                                       | 7         | .4      | .4            | 48.7               |
| M75.8 Other shoulder lesions                                                                     | 1         | .1      | .1            | 48.8               |
| M76.0 Gluteal tendinitis                                                                         | 17        | 1.1     | 1.1           | 49.8               |
| M76.3 Iliotibial band syndrome                                                                   | 6         | .4      | .4            | 50.2               |
| M76.5 Patella bursitis                                                                           | 5         | .3      | .3            | 50.5               |
| M76.6 Achilles tendinitis                                                                        | 8         | .5      | .5            | 51.0               |
| M76.7 Peroneal tendonitis                                                                        | 1         | .1      | .1            | 51.1               |
| M76.8 Other enthesopathies of lower limb (Anterior tibial syndrome, Posterior tibial tendinitis) | 14        | .9      | .9            | 51.9               |
| M77.0 Medial epicondylitis                                                                       | 6         | .4      | .4            | 52.3               |

# ICD10

|                                                                                                               | Frequency | Percent | Valid Percent | Cumulative Percent |
|---------------------------------------------------------------------------------------------------------------|-----------|---------|---------------|--------------------|
| M77.1 Lateral epicondylitis                                                                                   | 15        | .9      | .9            | 53.2               |
| M77.2 Periarthritis of wrist                                                                                  | 1         | .1      | .1            | 53.3               |
| M77.4 Metatarsalgia                                                                                           | 1         | .1      | .1            | 53.3               |
| M79.4 Fat pad pathology (knee)                                                                                | 2         | .1      | .1            | 53.5               |
| M94.0 Chondrocostal junction syndrome [Tietze] (Costochondritis)                                              | 2         | .1      | .1            | 53.6               |
| M99.9 Other musculoskeletal                                                                                   | 1         | .1      | .1            | 53.7               |
| Q65.8 Other congenital deformities of hip                                                                     | 1         | .1      | .1            | 53.7               |
| R10.2 Pelvic pain                                                                                             | 1         | .1      | .1            | 53.8               |
| R51.0 Headache                                                                                                | 1         | .1      | .1            | 53.8               |
| S03.4 Sprain and strain of jaw (acute)                                                                        | 2         | .1      | .1            | 54.0               |
| S13.4 Sprain and strain of cervical spine (Atlanto-axial (joints) Atlanto-occipital (joints) Whiplash injury) | 14        | .9      | .9            | 54.8               |
| S16.0 Injury of muscle and tendon at neck level                                                               | 84        | 5.2     | 5.2           | 60.0               |
| S23.3 Sprain and strain of thoracic spine                                                                     | 57        | 3.5     | 3.5           | 63.6               |
| S23.4 Sprain and strain of ribs and sternum                                                                   | 92        | 5.7     | 5.7           | 69.3               |
| S23.5 Sprain and strain of other and unspecified parts of thorax                                              | 1         | .1      | .1            | 69.3               |
| S33.5 Sprain and strain of lumbar spine                                                                       | 104       | 6.4     | 6.4           | 75.8               |
| S33.6 Sprain and strain of sacroiliac joint                                                                   | 58        | 3.6     | 3.6           | 79.4               |
| S39.0 Injury of muscle and tendon of abdomen, lower back and pelvis                                           | 50        | 3.1     | 3.1           | 82.5               |
| S43.4 Sprain and strain of shoulder joint (Coracohumeral (ligament), Rotator cuff capsule)                    | 14        | .9      | .9            | 83.3               |

# ICD10

|                                                                                   | Frequency | Percent | Valid Percent | Cumulative Percent |
|-----------------------------------------------------------------------------------|-----------|---------|---------------|--------------------|
| S43.5 Sprain and strain of acromioclavicular joint (Acromioclavicular ligament)   | 11        | .7      | .7            | 84.0               |
| S44.8 Injury of other nerves at shoulder and upper arm level                      | 4         | .2      | .2            | 84.3               |
| S46.0 Injury of muscle(s) and tendon(s) of the rotator cuff of shoulder           | 22        | 1.4     | 1.4           | 85.6               |
| S46.1 Injury of muscle and tendon of long head of biceps                          | 1         | .1      | .1            | 85.7               |
| S46.2 Injury of muscle and tendon of other parts of biceps                        | 3         | .2      | .2            | 85.9               |
| S46.3 Injury of muscle and tendon of triceps                                      | 2         | .1      | .1            | 86.0               |
| S46.7 Injury of multiple muscles and tendons at shoulder and upper arm level      | 6         | .4      | .4            | 86.4               |
| S46.8 Injury of other muscles and tendons at shoulder and upper arm level         | 15        | .9      | .9            | 87.3               |
| S53.4 Sprain and strain of elbow                                                  | 1         | .1      | .1            | 87.4               |
| S54.0 Injury of ulnar nerve at forearm level                                      | 3         | .2      | .2            | 87.5               |
| S56.0 Injury of flexor muscle and tendon of thumb at forearm level                | 1         | .1      | .1            | 87.6               |
| S56.1 Injury of long flexor muscle and tendon of other finger(s) at forearm level | 6         | .4      | .4            | 88.0               |
| S56.4 Injury of extensor muscle and tendon of other finger(s) at forearm level    | 2         | .1      | .1            | 88.1               |
| S56.7 Injury of multiple muscles and tendons at forearm level                     | 1         | .1      | .1            | 88.2               |
| S56.8 Injury of other and unspecified muscles and tendons at forearm level        | 2         | .1      | .1            | 88.3               |
| S62.0 Fracture of navicular [scaphoid] bone of hand                               | 1         | .1      | .1            | 88.4               |

# ICD10

|                                                                                    | Frequency | Percent | Valid Percent | Cumulative Percent |
|------------------------------------------------------------------------------------|-----------|---------|---------------|--------------------|
| S63.5 Strain or sprain of the wrist                                                | 10        | .6      | .6            | 89.0               |
| S63.6 Sprain and strain of finger(s)                                               | 4         | .2      | .2            | 89.2               |
| S66.8 Injury of other muscles and tendons at wrist and hand level                  | 1         | .1      | .1            | 89.3               |
| S74.0 Injury of sciatic nerve at hip and thigh level                               | 4         | .2      | .2            | 89.5               |
| S76.0 Injury of muscle and tendon of hip                                           | 41        | 2.5     | 2.5           | 92.1               |
| S76.1 Injury of quadriceps muscle and tendon Patellar ligament (tendon)            | 11        | .7      | .7            | 92.8               |
| S76.2 Injury of adductor muscle and tendon of thigh                                | 3         | .2      | .2            | 92.9               |
| S76.3 Injury of muscle and tendon of the posterior muscle group at thigh level     | 16        | 1.0     | 1.0           | 93.9               |
| S76.4 Injury of other and unspecified muscles and tendons at thigh level           | 6         | .4      | .4            | 94.3               |
| S76.7 Injury of multiple muscles and tendons at hip and thigh level                | 3         | .2      | .2            | 94.5               |
| S82.6 Fracture of lateral malleolus                                                | 1         | .1      | .1            | 94.5               |
| S83.2 Tear of meniscus, current                                                    | 6         | .4      | .4            | 94.9               |
| S83.4 Sprain and strain involving (fibular)(tibial) collateral ligament of knee    | 11        | .7      | .7            | 95.6               |
| S83.5 Sprain and strain involving (anterior) (posterior) cruciate ligament of knee | 4         | .2      | .2            | 95.8               |
| S83.6 Sprain and strain of other and unspecified parts of knee                     | 3         | .2      | .2            | 96.0               |
| S83.7 Injury to multiple structures of knee                                        | 1         | .1      | .1            | 96.1               |
| S84.0 Injury of tibial nerve at lower leg level                                    | 1         | .1      | .1            | 96.2               |
| S86.0 Injury of Achilles tendon                                                    | 1         | .1      | .1            | 96.2               |

# ICD10

|                                                                                            | Frequency | Percent | Valid Percent | Cumulative Percent |
|--------------------------------------------------------------------------------------------|-----------|---------|---------------|--------------------|
| S86.1 Injury of other muscle(s) and tendon(s) of posterior muscle group at lower leg level | 15        | .9      | .9            | 97.1               |
| S86.2 Injury of muscle(s) and tendon(s) of anterior muscle group at lower leg level        | 2         | .1      | .1            | 97.3               |
| S86.3 Injury of muscle(s) and tendon(s) of peroneal muscle group at lower leg level        | 5         | .3      | .3            | 97.6               |
| S86.7 Injury of multiple muscles and tendons at lower leg level                            | 2         | .1      | .1            | 97.7               |
| S86.8 Injury of other muscles and tendons at lower leg level                               | 2         | .1      | .1            | 97.8               |
| S92.3 Fracture of metatarsal bone                                                          | 2         | .1      | .1            | 98.0               |
| S92.5 Fracture of other toe                                                                | 1         | .1      | .1            | 98.0               |
| S93.2 Rupture of ligaments at ankle and foot level                                         | 1         | .1      | .1            | 98.1               |
| S93.4 Sprain and strain of ankle (Calcaneofibular Deltoid, Talofibular, Tibiofibular)      | 16        | 1.0     | 1.0           | 99.1               |
| S93.5 Sprain and strain of toe(s)                                                          | 2         | .1      | .1            | 99.2               |
| S93.6 Sprain and strain of other and unspecified parts of foot                             | 4         | .2      | .2            | 99.4               |
| S96.0 Injury of muscle and tendon of long flexor muscle of toe at ankle and foot level     | 2         | .1      | .1            | 99.6               |
| S96.1 Injury of muscle and tendon of long extensor muscle of toe at ankle and foot level   | 3         | .2      | .2            | 99.8               |
| S96.2 Injury of intrinsic muscle and tendon at ankle and foot level                        | 4         | .2      | .2            | 100.0              |
| Total                                                                                      | 1614      | 100.0   | 100.0         |                    |
